# Supplementary material
Source: PubMed Central journal article supplement (PMC3340054)
Supplement: 1119456109_pnas.201119456SI.pdf [file 1119456109_pnas.201119456SI.pdf]

# Supporting Information

Gruszka et al. 10.1073/pnas.1119456109

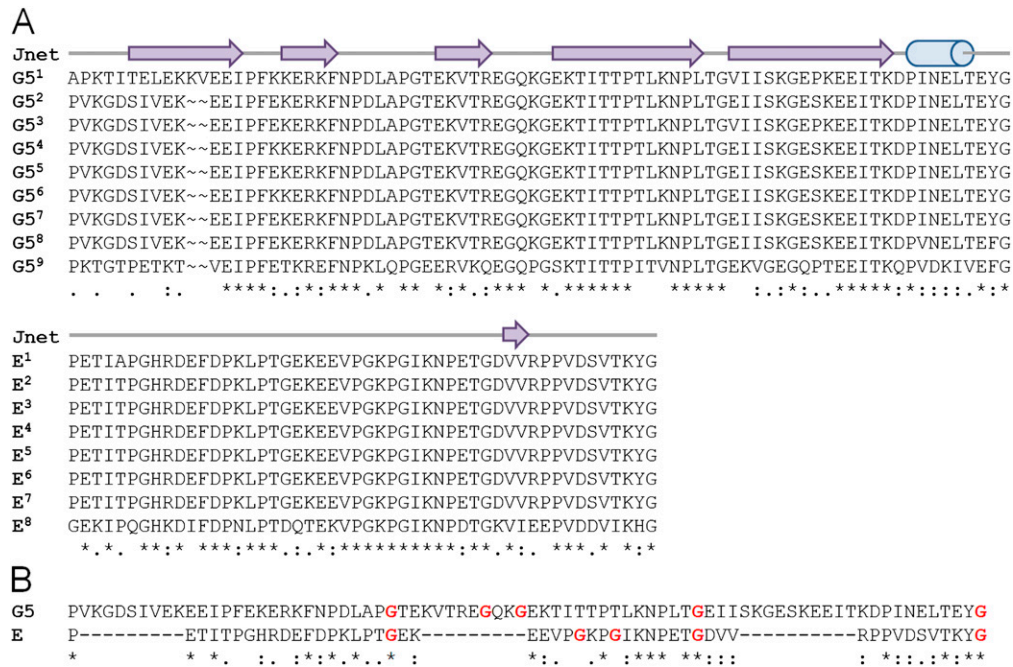

**Fig. S1.** Sequence alignment of *Staphylococcus aureus* surface protein G (SasG) domains. Conserved residues are indicated with an asterisk. (A) Alignment of G5 domains and E segments. The Jnet prediction indicates several regions of  $\beta$ -strand secondary structure for the G5 domain (1), whereas the E segment is predicted to be predominantly disordered (2, 3). (B) Alignment of the consensus sequences of G5 and E. The five conserved glycine residues associated with the  $\beta$ -triple helix- $\beta$  fold are shown in red.

1. Cole C, Barber JD, Barton GJ (2008) The Jpred 3 secondary structure prediction server. *Nucleic Acids Res* 36(Web Server issue):W197-201.
2. Romero P, et al. (2001) Sequence complexity of disordered protein. *Proteins* 42:38-48.
3. Dosztányi Z, Csizmek V, Tompa P, Simon I (2005) IUPred: Web server for the prediction of intrinsically unstructured regions of proteins based on estimated energy content. *Bioinformatics* 21:3433-3434.

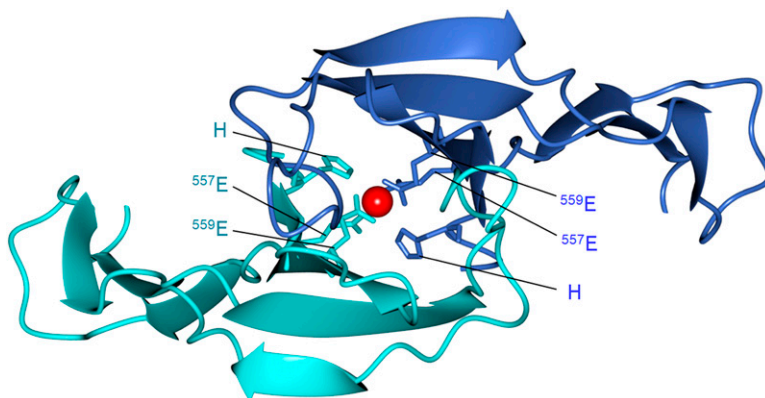

**Fig. S2.** Crystal structure of a nonnative Zn<sup>2+</sup>-mediated G5<sup>2</sup> dimer. Zn<sup>2+</sup> (red) is coordinated by a nonnative histidine residue and two native glutamate residues (<sup>557</sup>E and <sup>559</sup>E) from each of the two (cyan and blue) G5 molecules in the dimer.

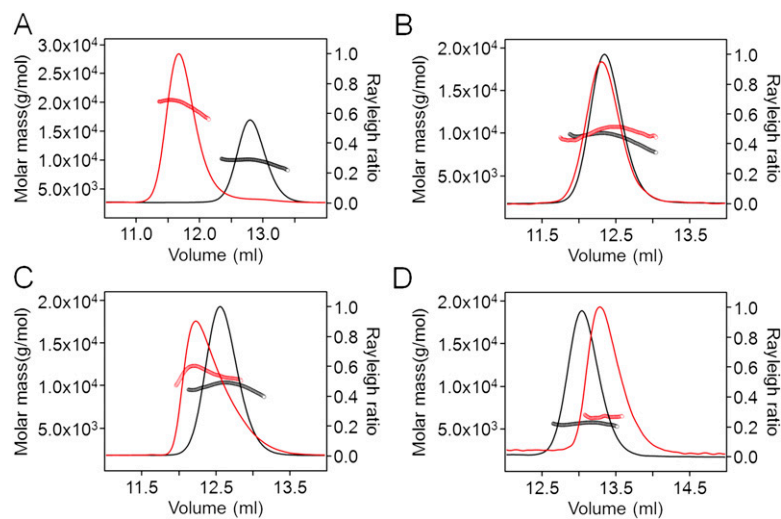

**Fig. S3.** Size-exclusion chromatography with multiangle laser light scattering analysis of oligomeric state of SasG modules in the presence (red) and absence (black) of  $Zn^{2+}$ . (A) GPHM-G5<sup>2</sup>: native sequence with four additional N-terminal amino acids (i.e., GPHM). (B) GPTK-G5<sup>2</sup>: native sequence with four additional N-terminal amino acids (i.e., GPTK). (C) G5<sup>1</sup>: native sequence with four additional N-terminal amino acids (i.e., GPHM). (D) E: native sequence with four additional N-terminal amino acids (i.e., GPHM). The exact molar masses and sequences are listed in Table S5.

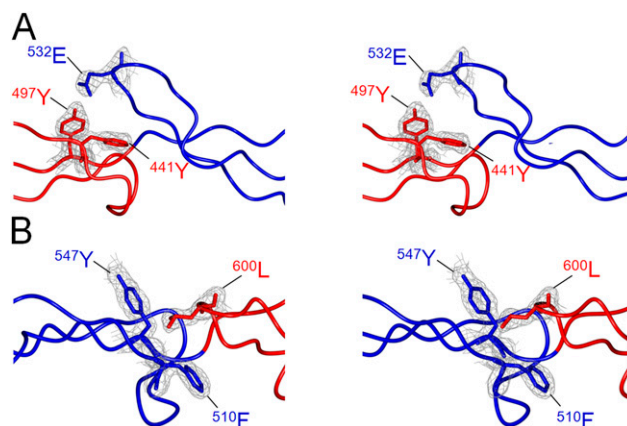

**Fig. S4.** Stereo images of interdomain interfaces in SasG highlighting the major differences between G5-E (A) and E-G5 (B). G5 and E domains are shown in red and blue, respectively. Electron density at  $1.0 \sigma$  is shown for the labeled residues.

**Table S1. Thermodynamic parameters of unfolding process calculated for two-state and non-two-state models**

| Module                               | Two-state model  |                             |                            | Non-two-state model |                             |                            |                                |
|--------------------------------------|------------------|-----------------------------|----------------------------|---------------------|-----------------------------|----------------------------|--------------------------------|
|                                      | $T_{m,r}$ , °C   | $\Delta H_{cal}$ , kcal/mol | $\Delta C_p$ , kcal/mol/°C | $T_{m,r}$ , °C      | $\Delta H_{cal}$ , kcal/mol | $\Delta H_{VH}$ , kcal/mol | $\Delta H_{cal}/\Delta H_{VH}$ |
| G5 <sup>1</sup>                      | $52.80 \pm 0.02$ | $59.2 \pm 0.1$              | $0.623 \pm 0.026$          | $53.31 \pm 0.01$    | $58.2 \pm 0.1$              | $60.1 \pm 0.1$             | 0.97                           |
| G5 <sup>2</sup>                      | $46.94 \pm 0.05$ | $58.2 \pm 0.1$              | $0.543 \pm 0.032$          | $47.61 \pm 0.01$    | $58.5 \pm 0.1$              | $57.1 \pm 0.3$             | 1.02                           |
| E-G5 <sup>2</sup>                    | $53.57 \pm 0.04$ | $86.8 \pm 0.2$              | $0.598 \pm 0.084$          | $53.85 \pm 0.02$    | $88.1 \pm 0.3$              | $85.5 \pm 0.4$             | 1.03                           |
| G5 <sup>1</sup> -E                   | $52.75 \pm 0.04$ | $58.0 \pm 0.2$              | —                          | $52.76 \pm 0.04$    | $59.6 \pm 0.3$              | $56.1 \pm 0.4$             | 1.06                           |
| G5 <sup>2</sup> -E                   | $47.13 \pm 0.04$ | $57.8 \pm 0.2$              | —                          | $47.13 \pm 0.04$    | $57.6 \pm 0.4$              | $58.0 \pm 0.5$             | 0.99                           |
| G5 <sup>1</sup> -E-G5 <sup>2</sup>   | $59.10 \pm 0.01$ | $147.0 \pm 0.3$             | $1.080 \pm 0.085$          | $59.12 \pm 0.01$    | $155.0 \pm 0.6$             | $140.0 \pm 0.7$            | 1.11                           |
| E-G5 <sup>2</sup> -E-G5 <sup>3</sup> | $57.63 \pm 0.02$ | $163.0 \pm 0.5$             | $1.240 \pm 0.159$          | $57.62 \pm 0.02$    | $183.0 \pm 1.2$             | $146.0 \pm 1.2$            | 1.25                           |

All errors quoted are for the fit to the data. Thermograms of folded SasG modules were fitted with the two-state model with  $\Delta C_p$ ,  $\Delta C_p$ , change in heat capacity upon unfolding;  $\Delta H_{cal}$ ; calorimetric enthalpy;  $\Delta H_{VH}$ , Van't Hoff enthalpy;  $T_{m,r}$ , melting temperature.

**Table S2. Crystallographic data and refinement statistics for E-G5<sup>2</sup>**

| Statistic                                           | Native E-G5 <sup>2</sup> |                        | SeMet E-G5 <sup>2</sup> -L17M-L103M |                        |
|-----------------------------------------------------|--------------------------|------------------------|-------------------------------------|------------------------|
| <b>Data collection</b>                              |                          |                        |                                     |                        |
| Space group                                         | <i>P</i> 2 <sub>1</sub>  |                        | <i>P</i> 2 <sub>1</sub>             |                        |
| Cell dimensions                                     |                          |                        |                                     |                        |
| <i>a</i> , <i>b</i> , <i>c</i> , Å                  | 36.8, 34.7, 55.8         | —                      | 54.6, 37.4, 71.8                    | —                      |
| $\alpha$ , $\beta$ , $\gamma$ , °                   | 90.0, 99.5, 90.0         | —                      | 90.0, 104.6, 90.0                   | —                      |
| Wavelength                                          | 0.9763                   | Peak<br>0.9793         | Inflection<br>0.9797                | Remote<br>0.9763       |
| Resolution, Å*                                      | 50.00–1.75 (1.86–1.75)   | 50.00–2.20 (2.28–2.20) | 50.00–2.20 (2.28–2.20)              | 50.00–2.20 (2.28–2.20) |
| <i>R</i> <sub>sym</sub> , %*                        | 5.4 (45.2)               | 9.0 (18.9)             | 7.5 (18.4)                          | 7.4 (17.9)             |
| <i>I</i> / $\sigma$ <i>I</i> *                      | 17.4 (3.0)               | 12.7 (2.8)             | 12.2 (2.7)                          | 12.1 (2.9)             |
| Completeness, %*                                    | 99.5 (98.7)              | 85.5 (39.3)            | 82.4 (32.5)                         | 83.0 (35.7)            |
| Redundancy*                                         | 4.0 (4.0)                | 6.4 (3.9)              | 3.2 (2.0)                           | 3.2 (2.0)              |
| <b>Refinement</b>                                   |                          |                        |                                     |                        |
| Resolution, Å                                       | 29.37–1.75               | —                      | —                                   | —                      |
| No. reflections                                     | 15,431                   | —                      | —                                   | —                      |
| <i>R</i> <sub>work</sub> / <i>R</i> <sub>free</sub> | 19.7/23.9                | —                      | —                                   | —                      |
| <b>No. atoms</b>                                    |                          |                        |                                     |                        |
| Protein                                             | 1,028                    | —                      | —                                   | —                      |
| Water                                               | 216                      | —                      | —                                   | —                      |
| <b>B-factors</b>                                    |                          |                        |                                     |                        |
| Protein                                             | 29.6                     | —                      | —                                   | —                      |
| Water                                               | 35.5                     | —                      | —                                   | —                      |
| <b>rmsd</b>                                         |                          |                        |                                     |                        |
| Bond length, Å                                      | 0.011                    | —                      | —                                   | —                      |
| Bond angle, °                                       | 1.6                      | —                      | —                                   | —                      |

\*Highest resolution shell is shown in parentheses.

**Table S3. Crystallographic data and refinement statistics for G5<sup>1</sup>-E-G5<sup>2</sup>**

| Statistic                                           | G5 <sup>1</sup> -E-G5 <sup>2</sup> |
|-----------------------------------------------------|------------------------------------|
| <b>Data collection</b>                              |                                    |
| Space group                                         | <i>P</i> 2 <sub>1</sub>            |
| Cell dimensions                                     |                                    |
| <i>a</i> , <i>b</i> , <i>c</i> , Å                  | 45.5, 84.8, 71.7                   |
| $\alpha$ , $\beta$ , $\gamma$ , °                   | 90.0, 100.4, 90.0                  |
| Resolution, Å*                                      | 50.00–1.87 (1.99–1.87)             |
| <i>R</i> <sub>sym</sub> , %*                        | 5.3 (36.7)                         |
| <i>I</i> / $\sigma$ <i>I</i> *                      | 14.9 (3.0)                         |
| Completeness, %*                                    | 98.1 (90.7)                        |
| Redundancy*                                         | 3.7 (3.7)                          |
| <b>Refinement</b>                                   |                                    |
| Resolution, Å                                       | 41.30–1.87                         |
| No. reflections                                     | 43,210                             |
| <i>R</i> <sub>work</sub> / <i>R</i> <sub>free</sub> | 20.5/26.6                          |
| <b>No. atoms</b>                                    |                                    |
| Protein                                             | 3,324                              |
| Mg                                                  | 5                                  |
| Tris                                                | 8                                  |
| Water                                               | 637                                |
| <b>B-factors</b>                                    |                                    |
| Protein                                             | 42.6                               |
| Mg                                                  | 34.0                               |
| Tris                                                | 42.3                               |
| Water                                               | 43.3                               |
| <b>rmsd</b>                                         |                                    |
| Bond length, Å                                      | 0.014                              |
| Bond angle, °                                       | 1.4                                |

\*Highest resolution shell is shown in parentheses.

**Table S4. Surface area values for SasG domains and other proteins**

| Protein                            | No. of residues | ASA, Å   |          | RSA, % |          | RSA ratio (nonpolar/all) |
|------------------------------------|-----------------|----------|----------|--------|----------|--------------------------|
|                                    |                 | All      | Nonpolar | All    | Nonpolar |                          |
| G5 <sup>1</sup> -E-G5 <sup>2</sup> | 214             | 15,826.1 | 9,408.9  | 46.88  | 48.65    | 1.04                     |
| E-G5 <sup>2</sup>                  | 132             | 9,470.5  | 5,537.5  | 46.29  | 47.20    | 1.02                     |
| G5 <sup>1</sup>                    | 80              | 6,222.6  | 2,428.0  | 48.47  | 47.20    | 0.97                     |
| G5 <sup>2</sup>                    | 78              | 6,122.4  | 3,542.0  | 49.53  | 51.26    | 1.03                     |
| G5 from RpfB                       | 80              | 6,317.8  | 3,688.9  | 50.62  | 51.79    | 1.02                     |
| E                                  | 50              | 3,774.2  | 2,352.6  | 49.66  | 52.96    | 1.07                     |
| 1WJ2*                              | 71              | 6,255.4  | 3,865.5  | 55.76  | 61.13    | 1.10                     |
| 1HMS <sup>†</sup>                  | 132             | 7,318.2  | 4,303.2  | 35.21  | 35.86    | 1.02                     |
| 1MDC <sup>†</sup>                  | 132             | 6,977.5  | 3,877.2  | 35.82  | 35.76    | 1.00                     |
| 3CO1 <sup>†</sup>                  | 130             | 7,779.9  | 4,505.9  | 38.90  | 40.21    | 1.03                     |
| 1QX6 <sup>†</sup>                  | 213             | 10,809.9 | 5,792.9  | 32.35  | 32.59    | 1.01                     |
| 1T2U <sup>†</sup>                  | 210             | 10,128.7 | 6,413.2  | 33.32  | 36.61    | 1.10                     |
| 2IWS <sup>†</sup>                  | 214             | 10,644.8 | 5,900.7  | 34.39  | 34.41    | 1.00                     |

ASA, accessible surface area; RSA, relative accessible surface area. ASA and RSA values, for all atoms and nonpolar side-chains, were calculated using NACCESS (1). RSA for each amino acid was calculated with respect to their ASA in an extended Ala-X-Ala tripeptide, imitating a random coil conformation.

\*Other protein with single-layer  $\beta$ -sheets.

<sup>†</sup>Globular proteins.

1. Hubbard SJ, Thornton J (1993) NACCESS, Computer Program; Department of Biochemistry and Molecular Biology (University College, London).

**Table S5. Molar masses of SasG constructs in the presence and absence of zinc, determined by SEC-MALLS**

| Module                               | Sequence                                                                                                                                                                                                                                                                                | MW (kg/mol) | SEC-MALLS molar mass (kg/mol) |            |
|--------------------------------------|-----------------------------------------------------------------------------------------------------------------------------------------------------------------------------------------------------------------------------------------------------------------------------------------|-------------|-------------------------------|------------|
|                                      |                                                                                                                                                                                                                                                                                         |             | -Zn                           | +Zn        |
| E                                    | GPHMITPGHRDEFDPKLPKTGEKEEVPGKPGIKNPETGDVVRP<br>PVDSVTK                                                                                                                                                                                                                                  | 5.29        | 5.6 ± 0.3                     | 6.3 ± 0.2  |
| G5 <sup>1</sup>                      | GPHMAPKTITTELEKKVEEIPFKKERKFNPDLAPGTEKVTREGQ<br>KGEKTITPTLNPLTGVIIKSGEPKEEITKDPINELTEYGPET                                                                                                                                                                                              | 9.70        | 10.0 ± 0.7                    | 11.6 ± 1.2 |
| G5 <sup>2</sup>                      | MYGPVKGDSIVEKEEIPFEKERKFNPDLAPGTEKVTREGQKG<br>EKTITPTLNPLTGEIISKGESKEEITKDPINELTEYGPET                                                                                                                                                                                                  | 9.36        | 9.3 ± 0.3                     | 9.2 ± 0.3  |
| G5 <sup>2</sup> -GPHM                | GPHMYGPVKGDSIVEKEEIPFEKERKFNPDLAPGTEKVTREG<br>QKGEKTITPTLNPLTGEIISKGESKEEITKDPINELTEYGPET                                                                                                                                                                                               | 9.65        | 9.8 ± 0.6                     | 19.6 ± 1.6 |
| G5 <sup>2</sup> -GPTK                | GPTKYGPVKGDSIVEKEEIPFEKERKFNPDLAPGTEKVTREG<br>QKGEKTITPTLNPLTGEIISKGESKEEITKDPINELTEYGPET                                                                                                                                                                                               | 9.62        | 10.3 ± 1.1                    | 9.7 ± 0.7  |
| B <sup>1</sup>                       | GPHMAPKTITTELEKKVEEIPFKKERKFNPDLAPGTEKVTREGQ<br>KGEKTITPTLNPLTGVIIKSGEPKEEITKDPINELTEYGPETIA<br>PGHRDEFDPKLPKTGEKEEVPGKPGIKNPETGDVVRPPVDSVTK                                                                                                                                            | 14.5        | 15.1 ± 0.9                    | 16.2 ± 1.0 |
| B <sup>2</sup>                       | GPHMYGPVKGDSIVEKEEIPFEKERKFNPDLAPGTEKVTREG<br>QKGEKTITPTLNPLTGEIISKGESKEEITKDPINELTEYGPETI<br>APGHRDEFDPKLPKTGEKEEVPGKPGIKNPETGDVVRPP<br>VDSVTKYGP                                                                                                                                      | 14.8        | 14.7 ± 0.3                    | 28.4 ± 0.3 |
| E-G5 <sup>2</sup>                    | GPETIAPGHRDEFDPKLPKTGEKEEVPGKPGIKNPETGDVVRP<br>PVDSVTKYGPVKGDSIVEKEEIPFEKERKFNPDLAPGTEKVTR<br>EGQKGEKTITPTLNPLTGEIISKGESKEEITKDPINE<br>LTEYGPET                                                                                                                                         | 14.4        | 14.2 ± 0.3                    | 15.3 ± 0.3 |
| E-G5 <sup>2</sup> -HM                | GPHMIAPGHRDEFDPKLPKTGEKEEVPGKPGIKNPETGDVVRP<br>PVDSVTKYGPVKGDSIVEKEEIPFEKERKFNPDLAPGTEKVTR<br>EGQKGEKTITPTLNPLTGEIISKGESKEEITKDPIN<br>ELTEYGPET                                                                                                                                         | 14.5        | 14.5 ± 0.1                    | 17.9 ± 1.4 |
| G5 <sup>1</sup> -E-G5 <sup>2</sup>   | GPHMAPKTITTELEKKVEEIPFKKERKFNPDLAPGTEKVTREGQ<br>KGEKTITPTLNPLTGVIIKSGEPKEEITKDPINELTEYGPETIA<br>PGHRDEFDPKLPKTGEKEEVPGKPGIKNPETGDVVRPPVDSVT<br>KYGPVKGDSIVEKEEIPFEKERKFNPDLAPGTEKVTREGQKG<br>EKTITPTLNPLTGEIISKGESKEEITKDPINELTEYGPET                                                   | 23.7        | 24.3 ± 1.2                    | 26.7 ± 2.9 |
| B <sup>1</sup> B <sup>2</sup>        | GPHMAPKTITTELEKKVEEIPFKKERKFNPDLAPGTEKVTREGQ<br>KGEKTITPTLNPLTGVIIKSGEPKEEITKDPINELTEYGPETIA<br>PGHRDEFDPKLPKTGEKEEVPGKPGIKNPETGDVVRPPVDSVT<br>KYGPVKGDSIVEKEEIPFEKERKFNPDLAPGTEKVTREGQKG<br>EKTITPTLNPLTGEIISKGESKEEITKDPINELTEYGPETIAPG<br>HRDEFDPKLPKTGEKEEVPGKPGIKNPETGDVVRPPVDSVTK | 28.6        | 29.9 ± 2.7                    | 29.8 ± 1.5 |
| E-G5 <sup>2</sup> -E-G5 <sup>3</sup> | GPHMIAPGHRDEFDPKLPKTGEKEEVPGKPGIKNPETGDVVRP<br>PVDSVTKYGPVKGDSIVEKEEIPFEKERKFNPDLAPGTEKVTR<br>EGQKGEKTITPTLNPLTGEIISKGESKEEITKDPINELTEYGP<br>ETITPGHRDEFDPKLPKTGEKEEVPGKPGIKNPETGDVVRPPV<br>DSVTKYGPVKGDSIVEKEEIPFEKERKFNPDLAPGTEKVTREG<br>QKGEKTITPTLNPLTGVIIKSGEPKEEITKDPINELTEYGPET  | 28.5        | 28.5 ± 1.1                    | 32.3 ± 2.3 |

Nonnative amino acids (from the expression vector after His-tag cleavage) are marked in red. MW, molecular weight; SEC-MALLS, size-exclusion chromatography with multiangle laser light scattering.
